# Supplementary material for: Argentophilicity induced anomalous thermal expansion behavior in a 2D silver squarate
Source: Royal Society of Chemistry journal article supplement (doi:10.1039/d0qi01166e), 2021-01-01
Supplement: d0qi01166e1.pdf [file d0qi01166e1.pdf]

# **Argentophilicity Induced Anomalous Thermal Expansion Behavior in 2D Silver Squarate**

Zhanning Liu,<sup>a</sup> Jianjian Yang,<sup>a</sup> Lilong Yang,<sup>a</sup> Xuan Li,<sup>a</sup> Rui Ma,<sup>b</sup> Rongming Wang,<sup>a</sup>  
Xianran Xing,<sup>b</sup> Daofeng Sun<sup>\*a</sup>

- a. School of Materials Science and Engineering, China University of Petroleum (East China), Qingdao, Shandong, 266580, China.
- b. Beijing Advanced Innovation Center for Materials Genome Engineering, Institute of Solid State Chemistry, University of Science and Technology Beijing, Beijing, 100083, China.

**Table S1** Crystallographic data of compound Ag\_sq

| Name                               | Ag_sq                                             |
|------------------------------------|---------------------------------------------------|
| Empirical formula                  | C <sub>4</sub> H <sub>3</sub> O <sub>5</sub> Ag   |
| Formula weight                     | 238.93                                            |
| Crystal system                     | Monoclinic                                        |
| Space group                        | <i>C2/c</i>                                       |
| a/Å                                | 13.358(3)                                         |
| b/Å                                | 8.2296(9)                                         |
| c/Å                                | 11.1054(16)                                       |
| α/°                                | 90                                                |
| β/°                                | 118.508(17)                                       |
| γ/°                                | 90                                                |
| Volume/ Å <sup>3</sup>             | 1072.8(4)                                         |
| Z                                  | 8                                                 |
| ρ <sub>cal</sub> g/cm <sup>3</sup> | 2.934                                             |
| 2θ range                           | 6.53~70.1                                         |
| Independent reflections            | 2016                                              |
| Goodness-of-fit on F <sup>2</sup>  | 1.267                                             |
| Final R indexes [I >=2σ(I)]        | R <sub>1</sub> =0.1023<br>wR <sub>2</sub> =0.2693 |
| Final R indexes [all data]         | R <sub>1</sub> =0.1059<br>wR <sub>2</sub> =0.2782 |
| CCDC                               | 2014485                                           |

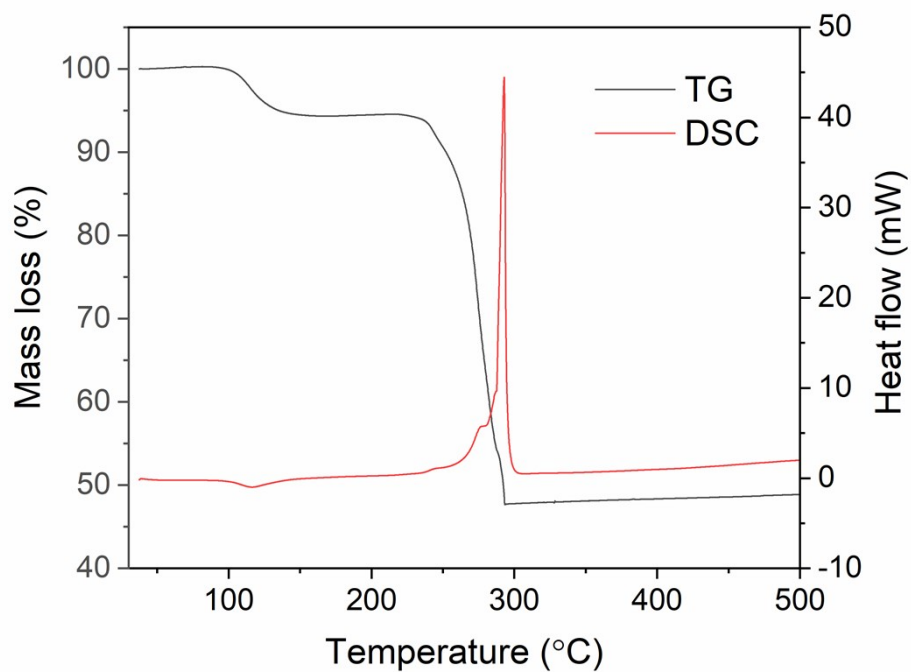

**Figure S1** TG-DSC curves of Ag\_sq in air.

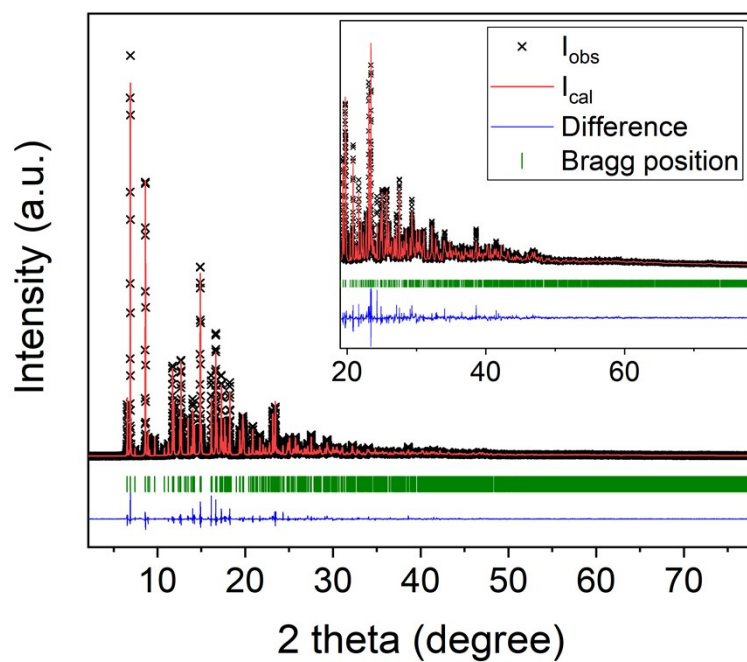

**Figure S2** Rietveld refinement of the high resolution synchrotron X-ray powder diffraction pattern of Ag\_sq at 300K ( $R_p = 5.05\%$ ,  $wR_p = 7.52\%$ )

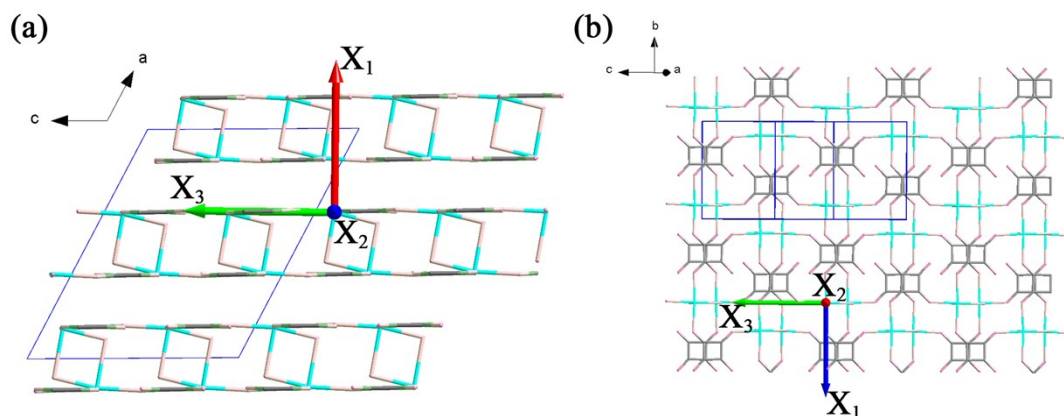

**Figure S3** Illustration of the three principal axes

**Table S2** Some representative 2D materials with NTE.

| Name             | CTE (MK <sup>-1</sup> ) | Temperature range (K) | Reference |
|------------------|-------------------------|-----------------------|-----------|
| Ag_sq            | -6.1(2)                 | 100~300               | This work |
| Graphene         | -8.0                    | 200~400               | 1         |
| Silicene         | -5.3                    | -                     | 2         |
| Germanene        | -2.1                    | -                     | 2         |
| Blue phosphorene | -4.2                    | -                     | 2         |
| Boron nitride    | -2.9 (at 293K)          | 0~770                 | 3         |

**Table S3** Proton conductivities of some representative compounds

| Name                                                                                                                                   | Conductivity (S cm <sup>-1</sup> ) | Condition       | References |
|----------------------------------------------------------------------------------------------------------------------------------------|------------------------------------|-----------------|------------|
| Ag_sq                                                                                                                                  | $1.4 \times 10^{-4}$               | 80°C, 99% R. H. | This work  |
| Ferrous Oxalate Dihydrate                                                                                                              | $1.3 \times 10^{-4}$               | 25°C, 98% R. H. | 4          |
| (N <sub>2</sub> H <sub>5</sub> )[CeEu(C <sub>2</sub> O <sub>4</sub> ) <sub>4</sub> (N <sub>2</sub> H <sub>5</sub> )]·4H <sub>2</sub> O | $3.42 \times 10^{-4}$              | RT, 98% R. H.   | 5          |
| Cu <sub>4</sub> (L) <sub>2</sub> (OH) <sub>2</sub> (DMF) <sub>2</sub>                                                                  |                                    |                 |            |
| L = 5-sulfoisophthalic acid                                                                                                            | $7.4 \times 10^{-4}$               | 95°C, 95% R. H. | 6          |
| monosodium salt                                                                                                                        |                                    |                 |            |
| β-PCMOF2                                                                                                                               | $1.3 \times 10^{-3}$               | 85°C, 90% R. H. | 7          |
| PCMOF10                                                                                                                                | $3.55 \times 10^{-2}$              | 70°C, 95% R. H. | 8          |

|                                                             |                      |                |    |
|-------------------------------------------------------------|----------------------|----------------|----|
| Ca-PiPhA-NH <sub>3</sub>                                    | $6.6 \times 10^{-2}$ | 24°C, 98% R. H | 9  |
| LiCl@[Ca(C <sub>4</sub> O <sub>4</sub> )(H <sub>2</sub> O)] | $1.8 \times 10^{-2}$ | 25°C, 40% R. H | 10 |

## Reference:

1. D. Yoon, Y. W. Son, H. Cheong. Negative thermal expansion coefficient of graphene measured by Raman spectroscopy. *Nano. Lett.*, 2011, **11**, 3227-3231.
2. X. Ge, K. Yao, J. Lü, Comparative study of phonon spectrum and thermal expansion of graphene, silicene, germanene, and blue phosphorene, *Phys. Rev. B*, 2016, **94**, 165433.
3. R. S. Pease, An X-ray study of boron nitride, *Acta Cryst.* 1952, **5**, 356-361.
4. T. Yamada, M. Sadakiyo, H. Kitagawa, *J. Am. Chem. Soc.*, 2009, **131**, 3144–3145.
5. K. Zhang, X. Xie, H. Li, J. Gao, L. Nie, Y. Pan, J. Xie, D. Tian, W. Liu, Q. Fan, H. Su, L. Huang, W. Huang., Highly Water-Stable Lanthanide–Oxalate MOFs with Remarkable Proton Conductivity and Tunable Luminescence, *Adv. Mater.*, 2017, **29**, 1701804.
6. X. Meng, S. Song, X. Song, M. Zhu, S. Zhao, L. Wu, H. Zhang, A tetranuclear copper cluster-based MOF with sulfonate–carboxylate ligands exhibiting high proton conduction properties, *Chem. Commun.*, 2015, **51**, 8150-8152.
7. S. Kim, K. W. Dawson, B. S. Gelfand, J. M. Taylor, G. K. Shimizu, Enhancing Proton Conduction in a Metal–Organic Framework by Isomorphous Ligand Replacement, *J. Am. Chem. Soc.* 2013, **135**, 963–966.
8. P. Ramaswamy, N. E. Wong, B. S. Gelfand, G. K. H. Shimizu, A Water Stable Magnesium MOF That Conducts Protons over  $10^{-2}$  S cm<sup>-1</sup>, *J. Am. Chem. Soc.* 2015, **137**, 24, 7640–7643.
9. M. Bazaga-Garcia, R. M. P. Colodrero, M. Papadaki, P. Garczarek, J. Zon, P. Olivera-Pastor, E. R. Losilla, L. Leon-Reina, M. A. G. Aranda, D. Choquesillo-Lazarte, K. D. Demadis, A. Cabeza, Guest Molecule-Responsive Functional Calcium Phosphonate Frameworks for Tuned Proton Conductivity, *J. Am. Chem. Soc.*, 2014, **136**, 5731–5739.
10. S. Horike, Y. Kamitsubo, M. Inukai, T. Fukushima, D. Umeyama, T. Itakura, S. Kitagawa, Postsynthesis Modification of a Porous Coordination Polymer by LiCl To Enhance H<sup>+</sup> Transport., *J. Am. Chem. Soc.*, 2013, **135**, 4612–4615.
